# Supplementary material for: A water-soluble tetraphenylethene based probe for luminescent carbon dioxide detection and its biological application
Source: Royal Society of Chemistry journal article supplement (doi:10.1039/c5tc03327f), 2015-01-01
Supplement: c5tc03327f1.pdf [file c5tc03327f1.pdf]

## Electronic Supplementary Information

### A water-soluble tetraphenylethene based probe for luminescent carbon dioxide detection and its biological application

Yun Ma, Yi Zeng, Hua Liang, Cheuk-Lam Ho, Qiang Zhao,\* Wei Huang and Wai-Yeung Wong\*

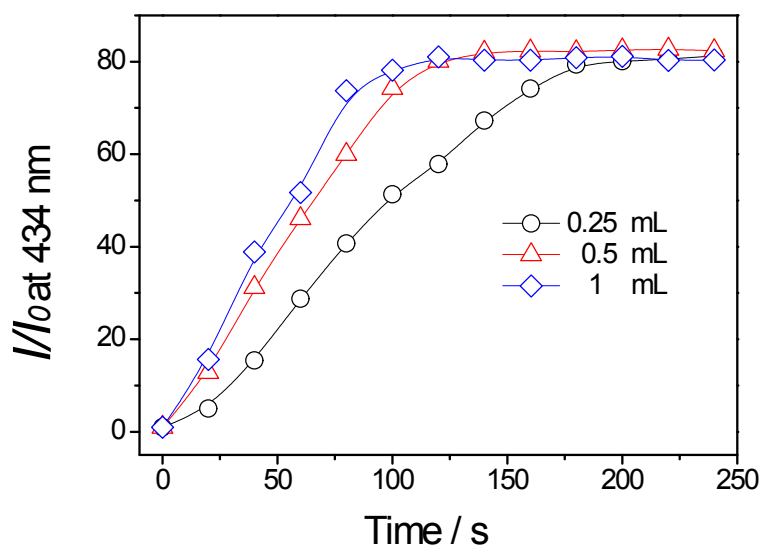

**Fig. S1** Time-dependent fluorescence spectra of TPE-ONa in aqueous solution with different amounts of  $\text{CO}_2$  gas (0.25, 0.5, 1.0 mL).

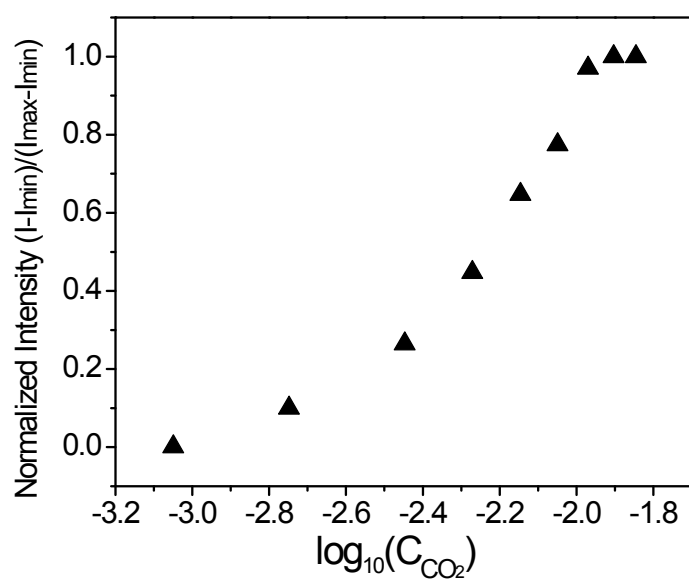

**Fig. S2** Changes in the fluorescence intensity of a solution of TPE-ONa in aqueous solution (50  $\mu\text{M}$ ) with various quantities of  $\text{CO}_2$  gas.

$I_{\min}$  represents the fluorescence intensity (at 434 nm) of TPE-ONa

$I_{\max}$  represents the fluorescence intensity (at 434 nm) of TPE-ONa by bubbling with 0.32 mL  $\text{CO}_2$  gas.
